# Supplementary material for: MBNL1-mediated regulation of differentiation RNAs promotes myofibroblast transformation and the fibrotic response
Source: PubMed Central journal article supplement (PMC4703843; doi:10.1038/ncomms10084), 2015-12-16
Supplement: ncomms10084-s1.pdf [file ncomms10084-s1.pdf]

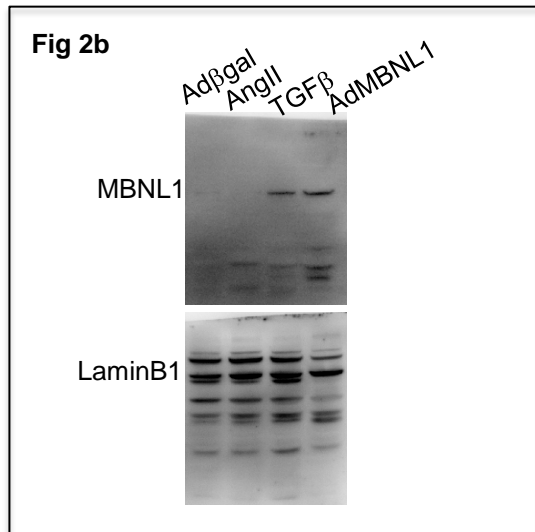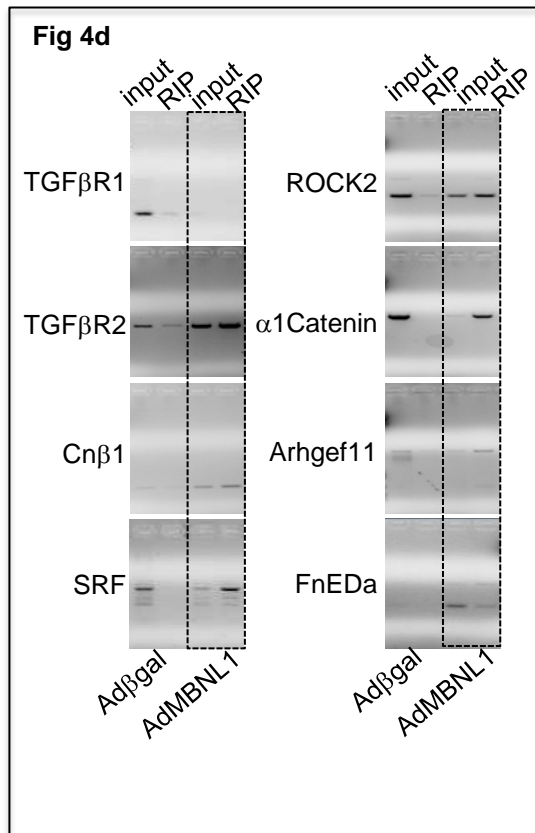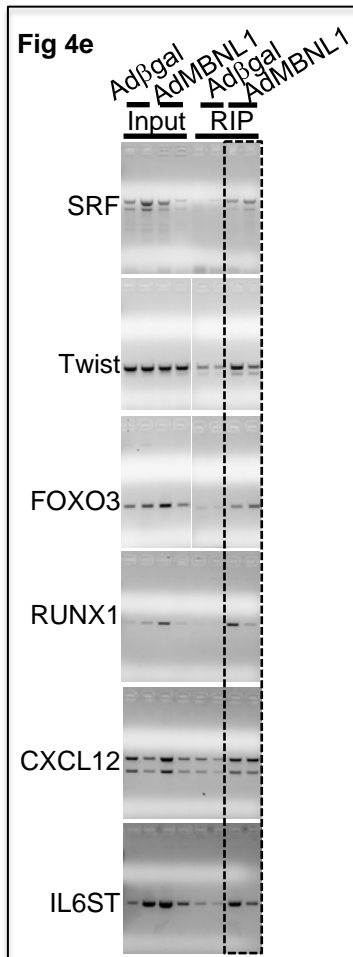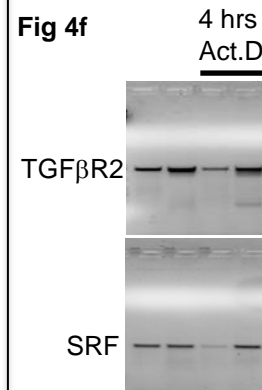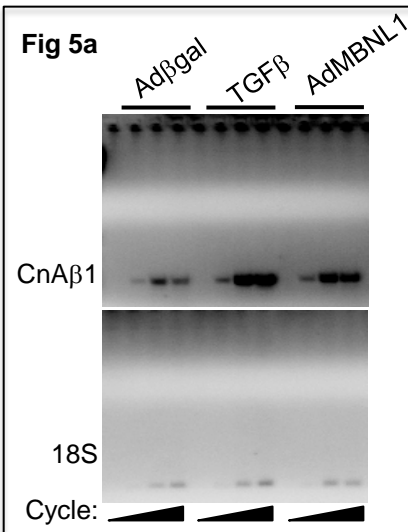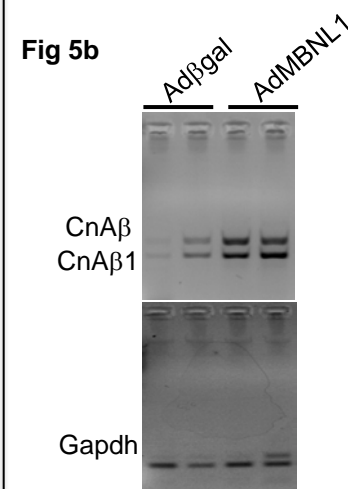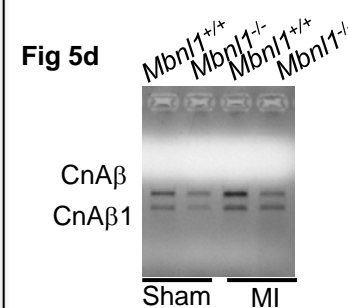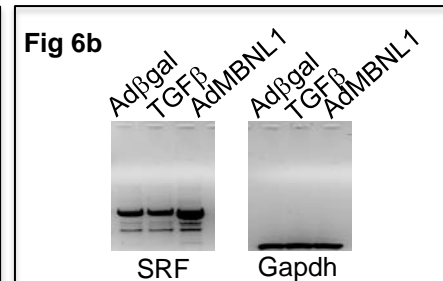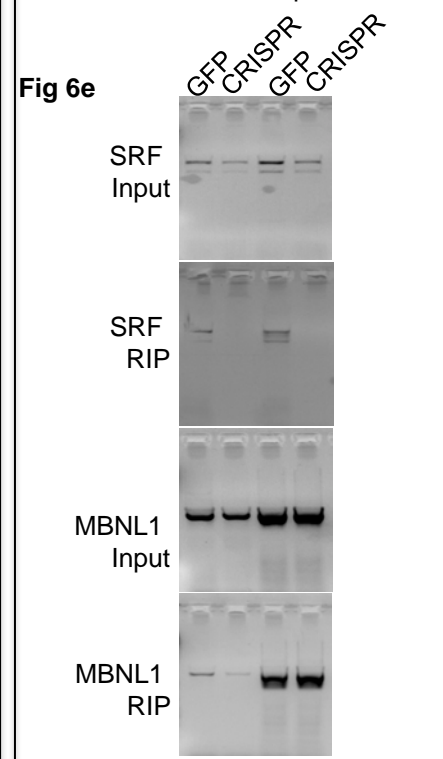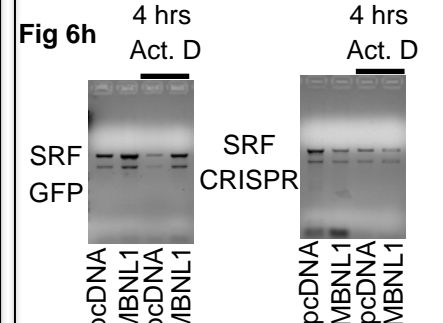

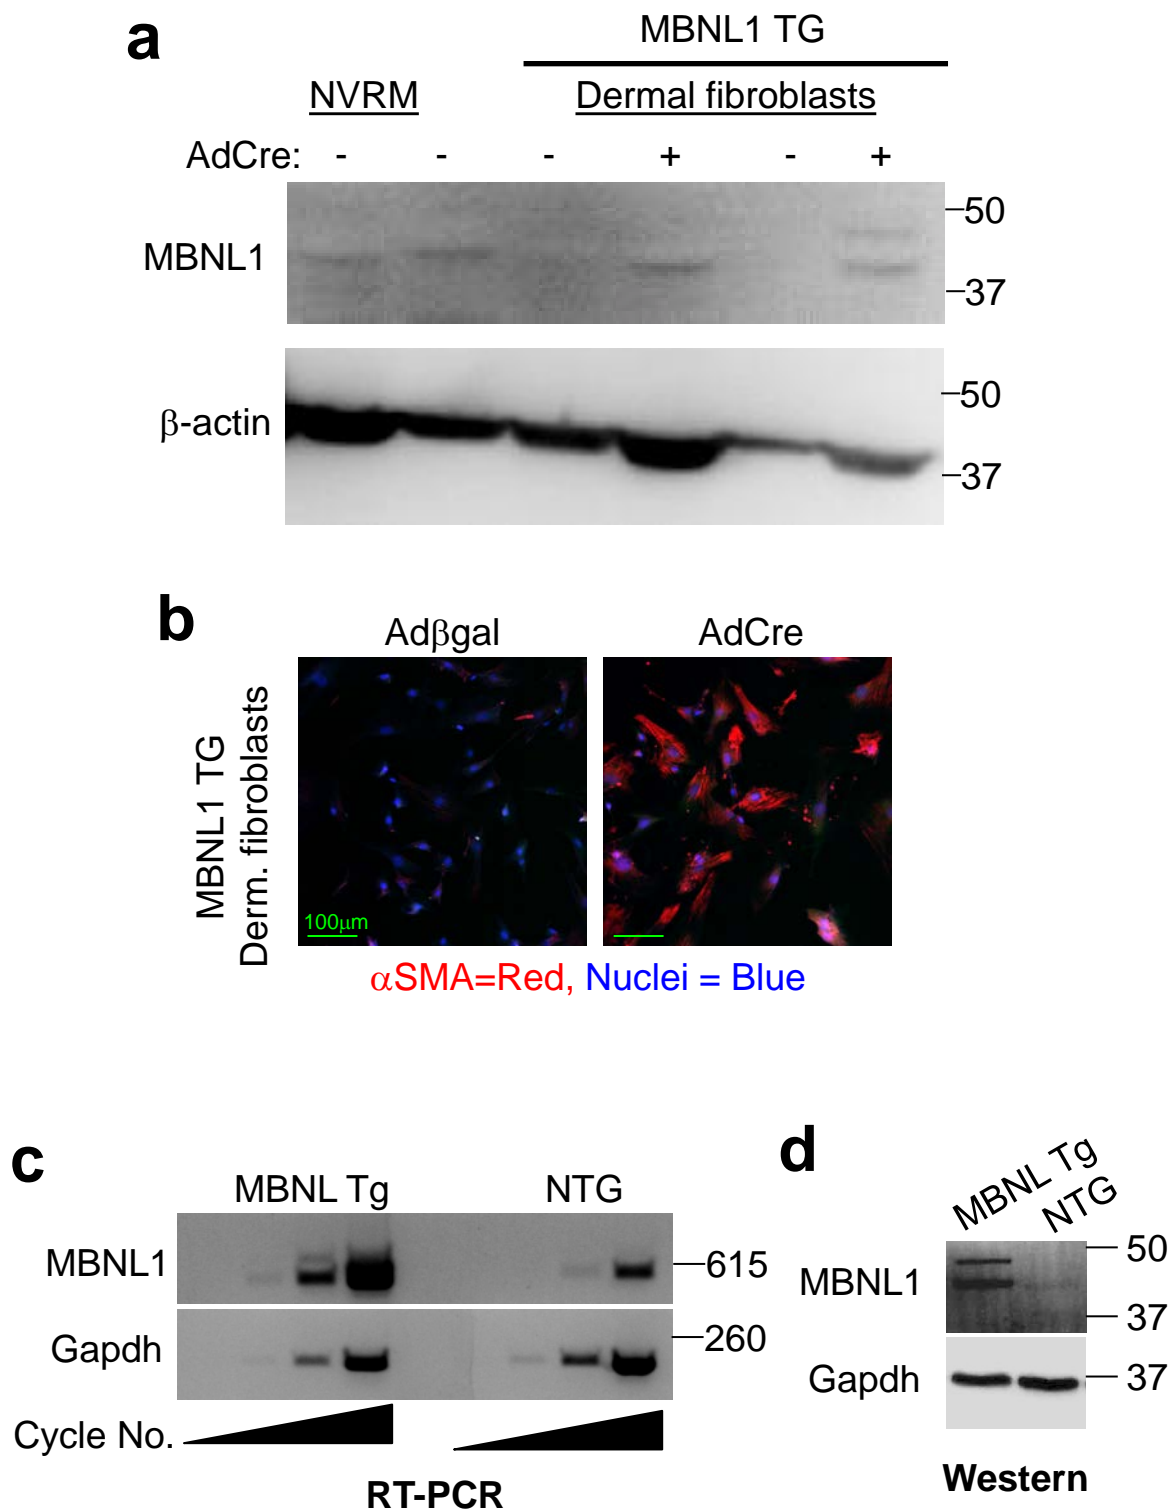

**Supplementary Figure 2.** Analysis of MBNL1 expression in fibroblasts derived from MBNL1 transgenic mice. **(a)** Western blot analysis of MBNL1 expression in primary dermal fibroblasts isolated from LoxP-dependent MBNL1 TG mice adenovirally infected with either AdCre or Ad $\beta$ gal (-). Neonatal rat cardiac myocytes (NVRM) were used as a positive control for MBNL1 expression.  $\beta$ -actin was used as a loading control. **(b)** Immunofluorescent staining of  $\alpha$ SMA-positive (red) stress fibers in primary dermal fibroblasts isolated from LoxP-dependent MBNL1 TG mice adenovirally infected with either AdCre or Ad $\beta$ gal. Scale bar = 30  $\mu$ m. **(c)** RT-PCR analysis of MBNL1 mRNA in fibroblasts isolated from the hearts of MBNL1 TG-*Tcf2*<sup>1MCM</sup> and NTG-*Tcf2*<sup>1MCM</sup> mice. Gapdh was used as a control. **(d)** Western blot analysis of MBNL1 expression in fibroblasts isolated from the hearts of MBNL1 TG-*Tcf2*<sup>1MCM</sup> and NTG-*Tcf2*<sup>1MCM</sup> mice. Gapdh was used as a loading control. Molecular weight markings are shown on the right of the blots in panels a and d, while DNA size in base pairs is marked on the right of panels c. Refers to [Figure 3](#)

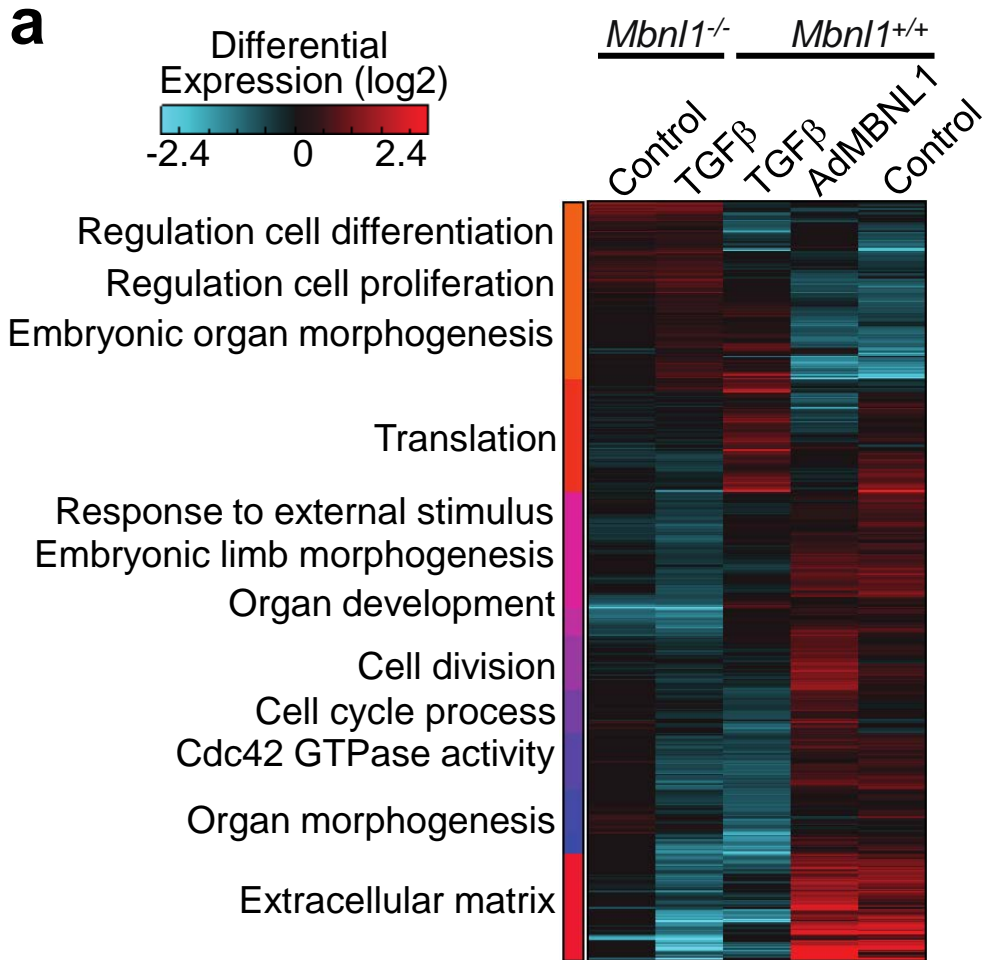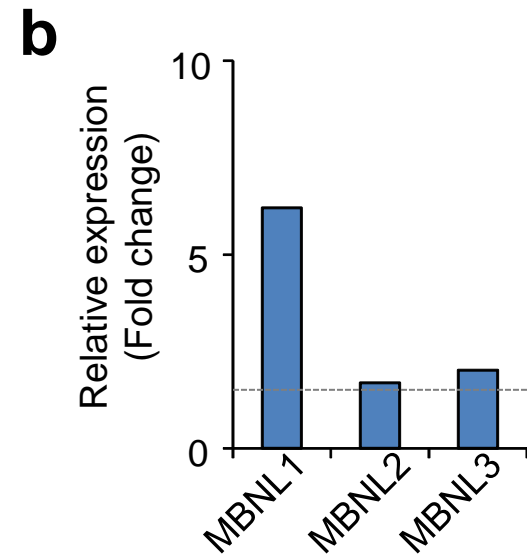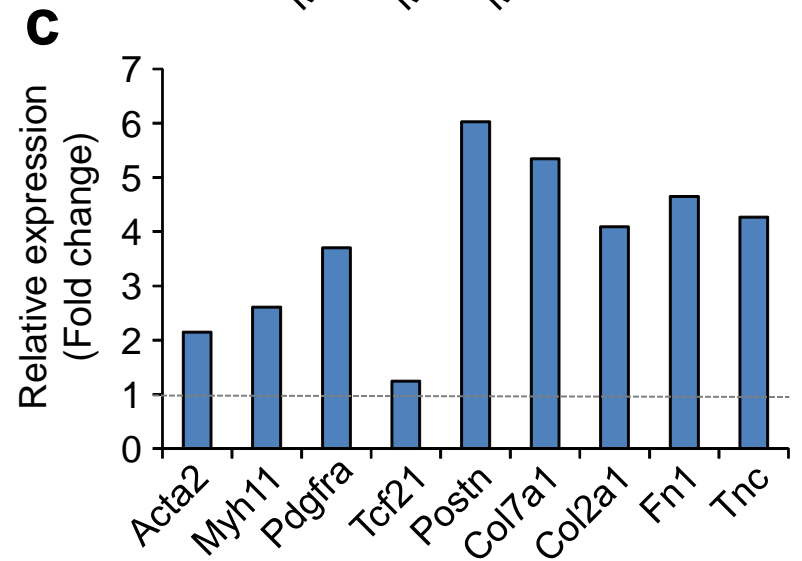

**Supplementary Figure 3.** MBNL1 transduced MEFs have the genetic profile of a fully matured myofibroblast. **(a)** Heat map depicting differential gene expression clusters generated from RNAseq in *Mbnl1*<sup>-/-</sup> and *Mbnl1*<sup>+/+</sup> MEFs with and without TGFβ or AdMBNL1 infection. The list on the left corresponds to changed gene categories in the heat map. **(b)** RNA expression levels of the MBNL gene family (MBNL1-3) in MEFs infected with AdMBNL1. **(c)** Key myofibroblast genes in MEFs infected with AdMBNL1, expressed relative to control, as determined by RNAseq analysis. Refers to [Figure 4](#).

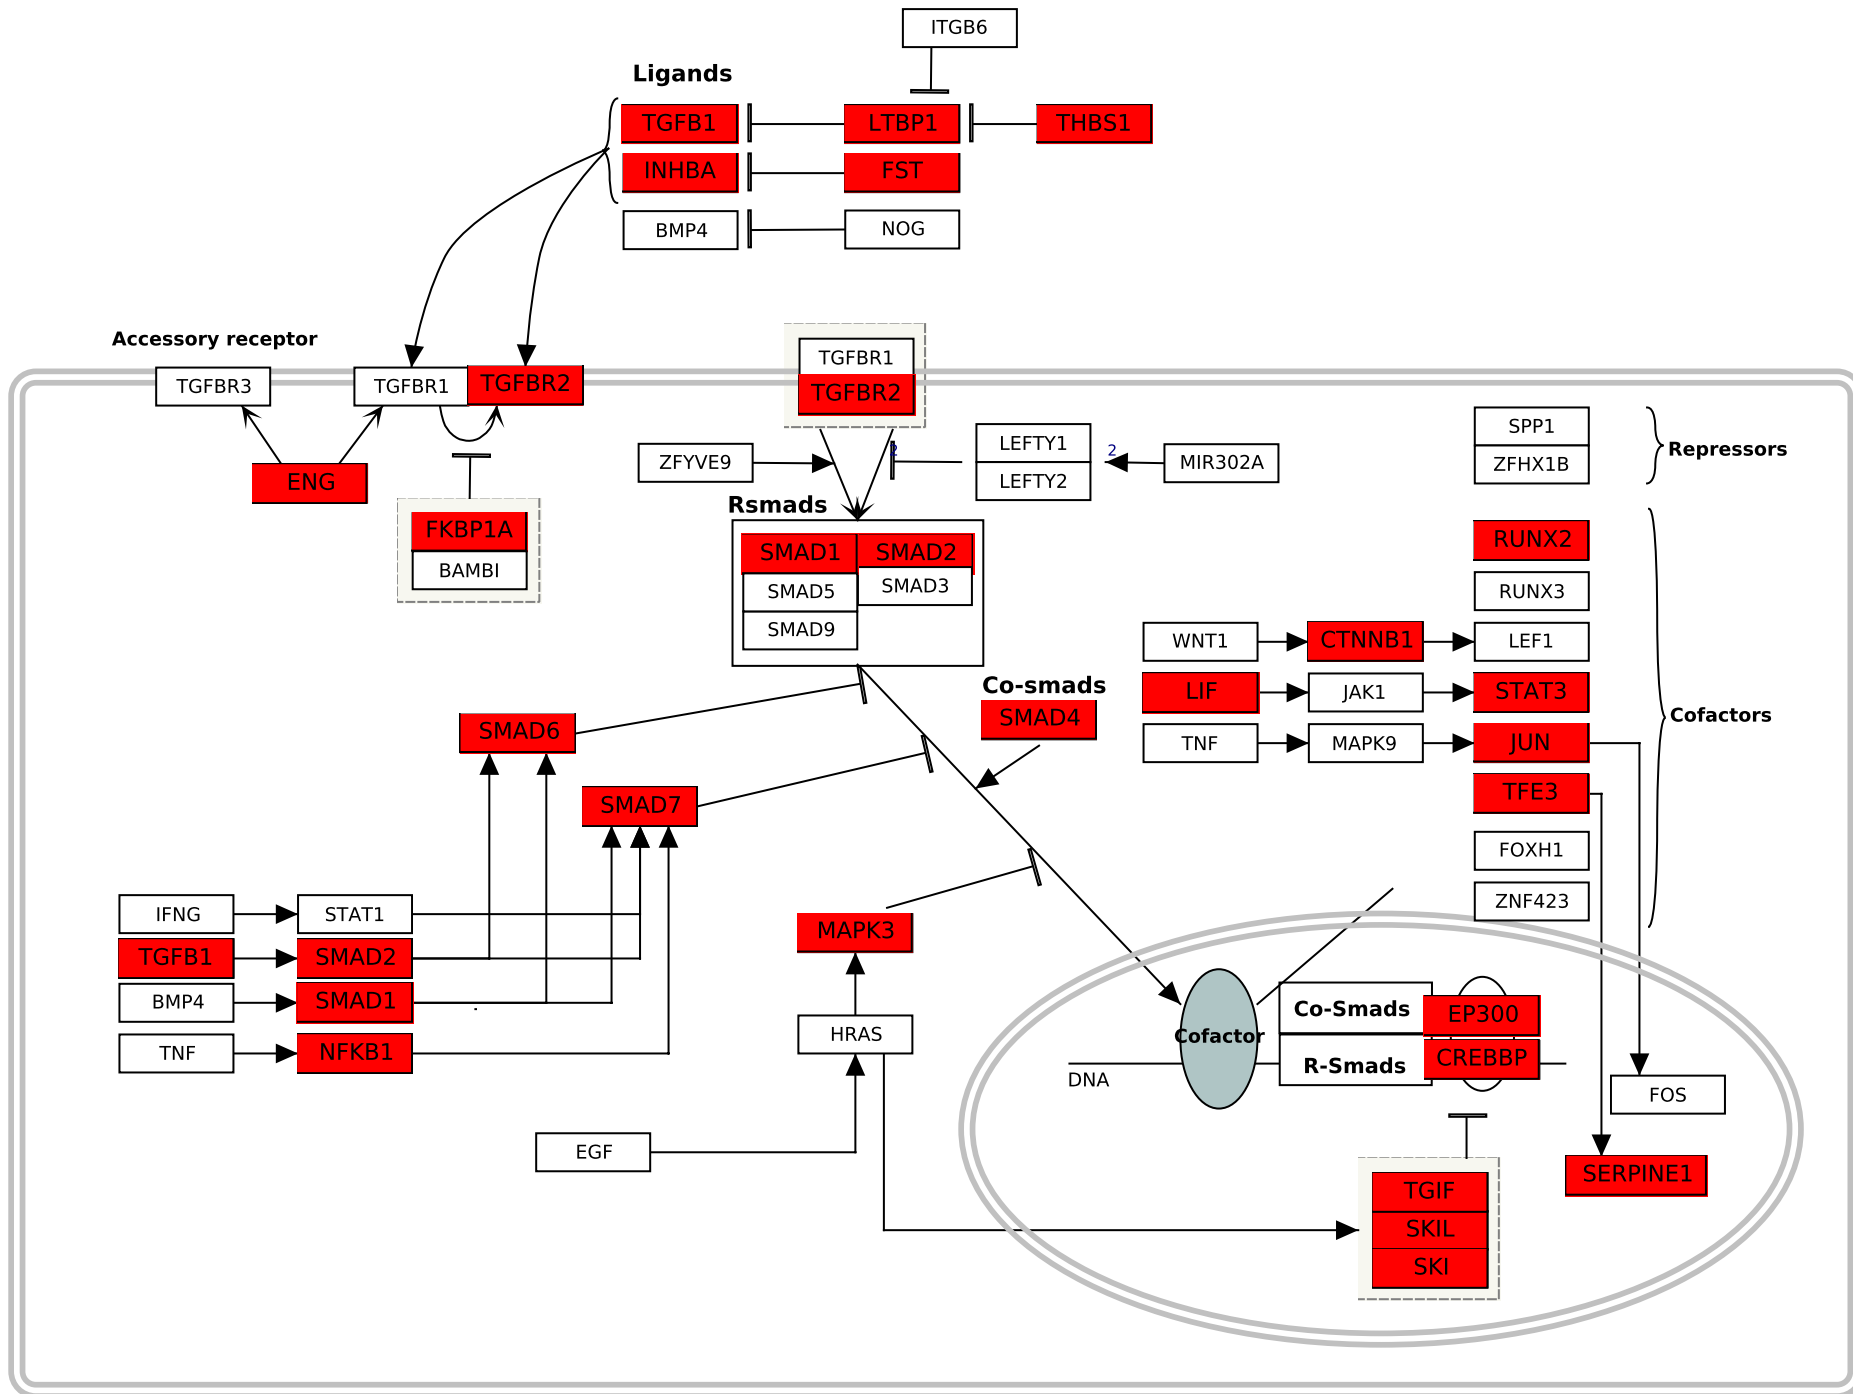

**Supplementary Figure 4.** Wikipathway for TGF $\beta$  signaling (WP560). Transcripts that immunoprecipitated with MBNL1 are colored in red. Refers to [Figure 4](#)

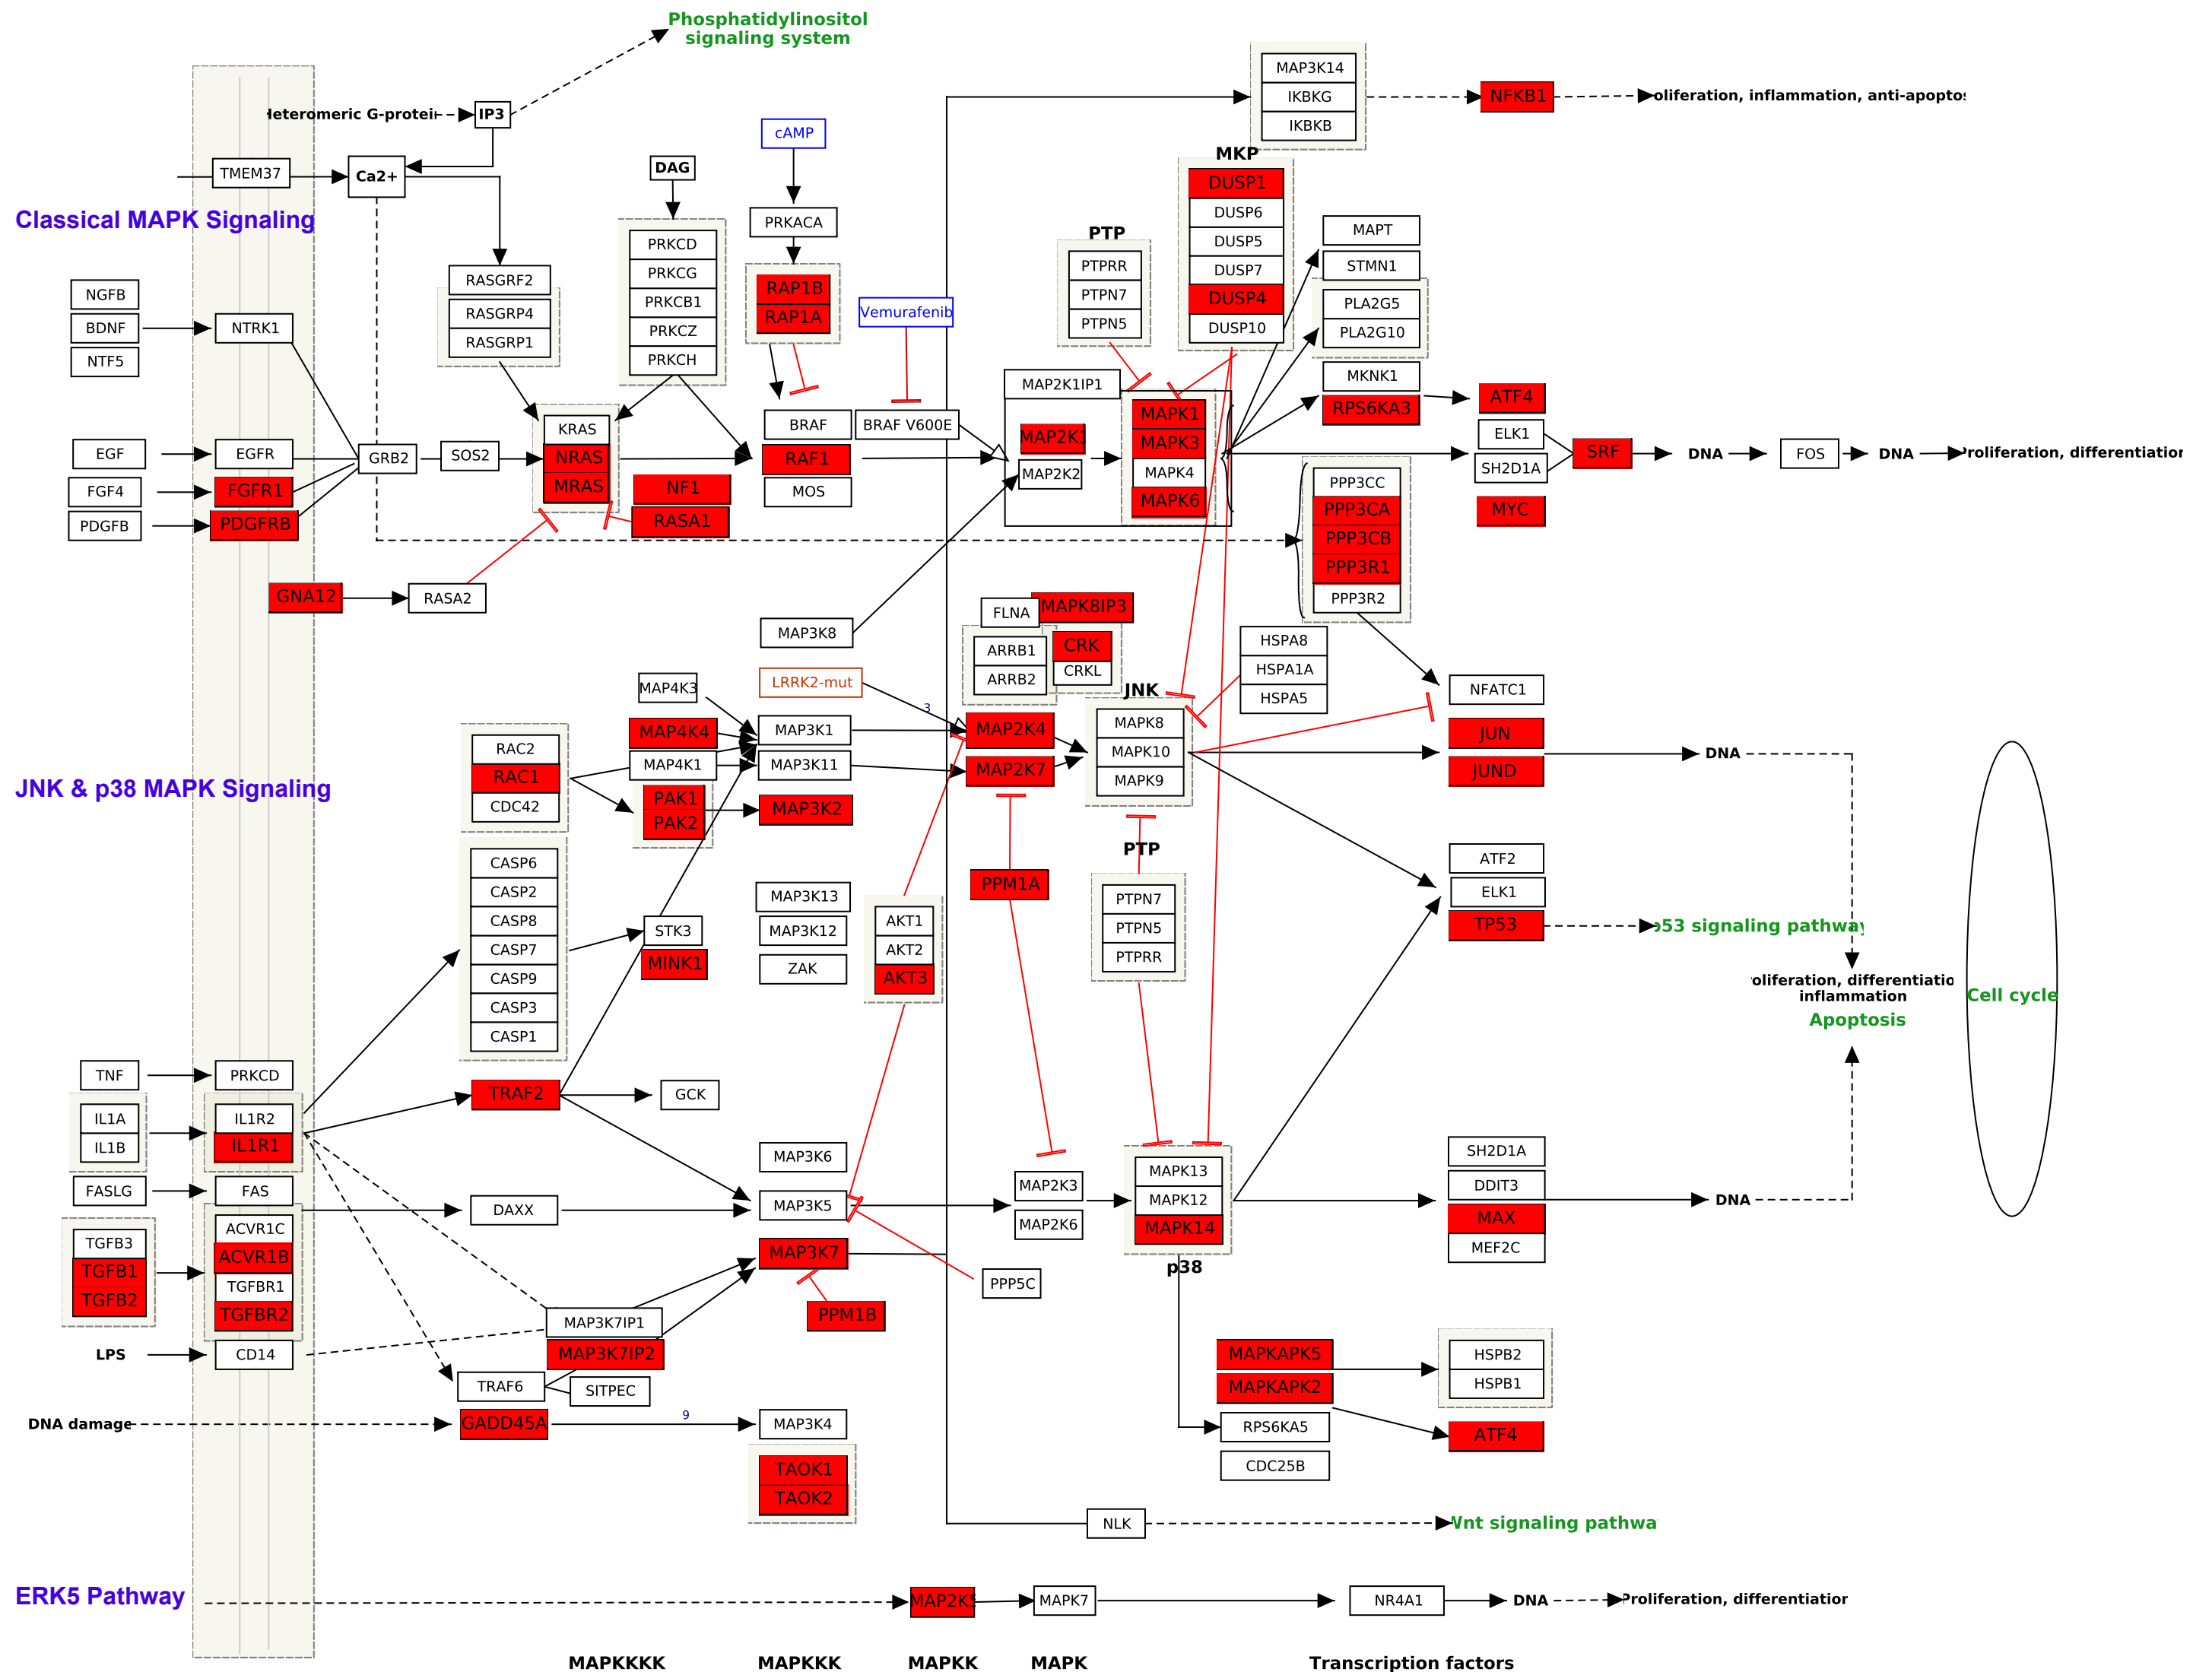

Supplementary Figure 5. Wikipathway for MAPK signaling (WP382). Transcripts that immunoprecipitated with MBNL1 are colored in red. Refers to Figure 4

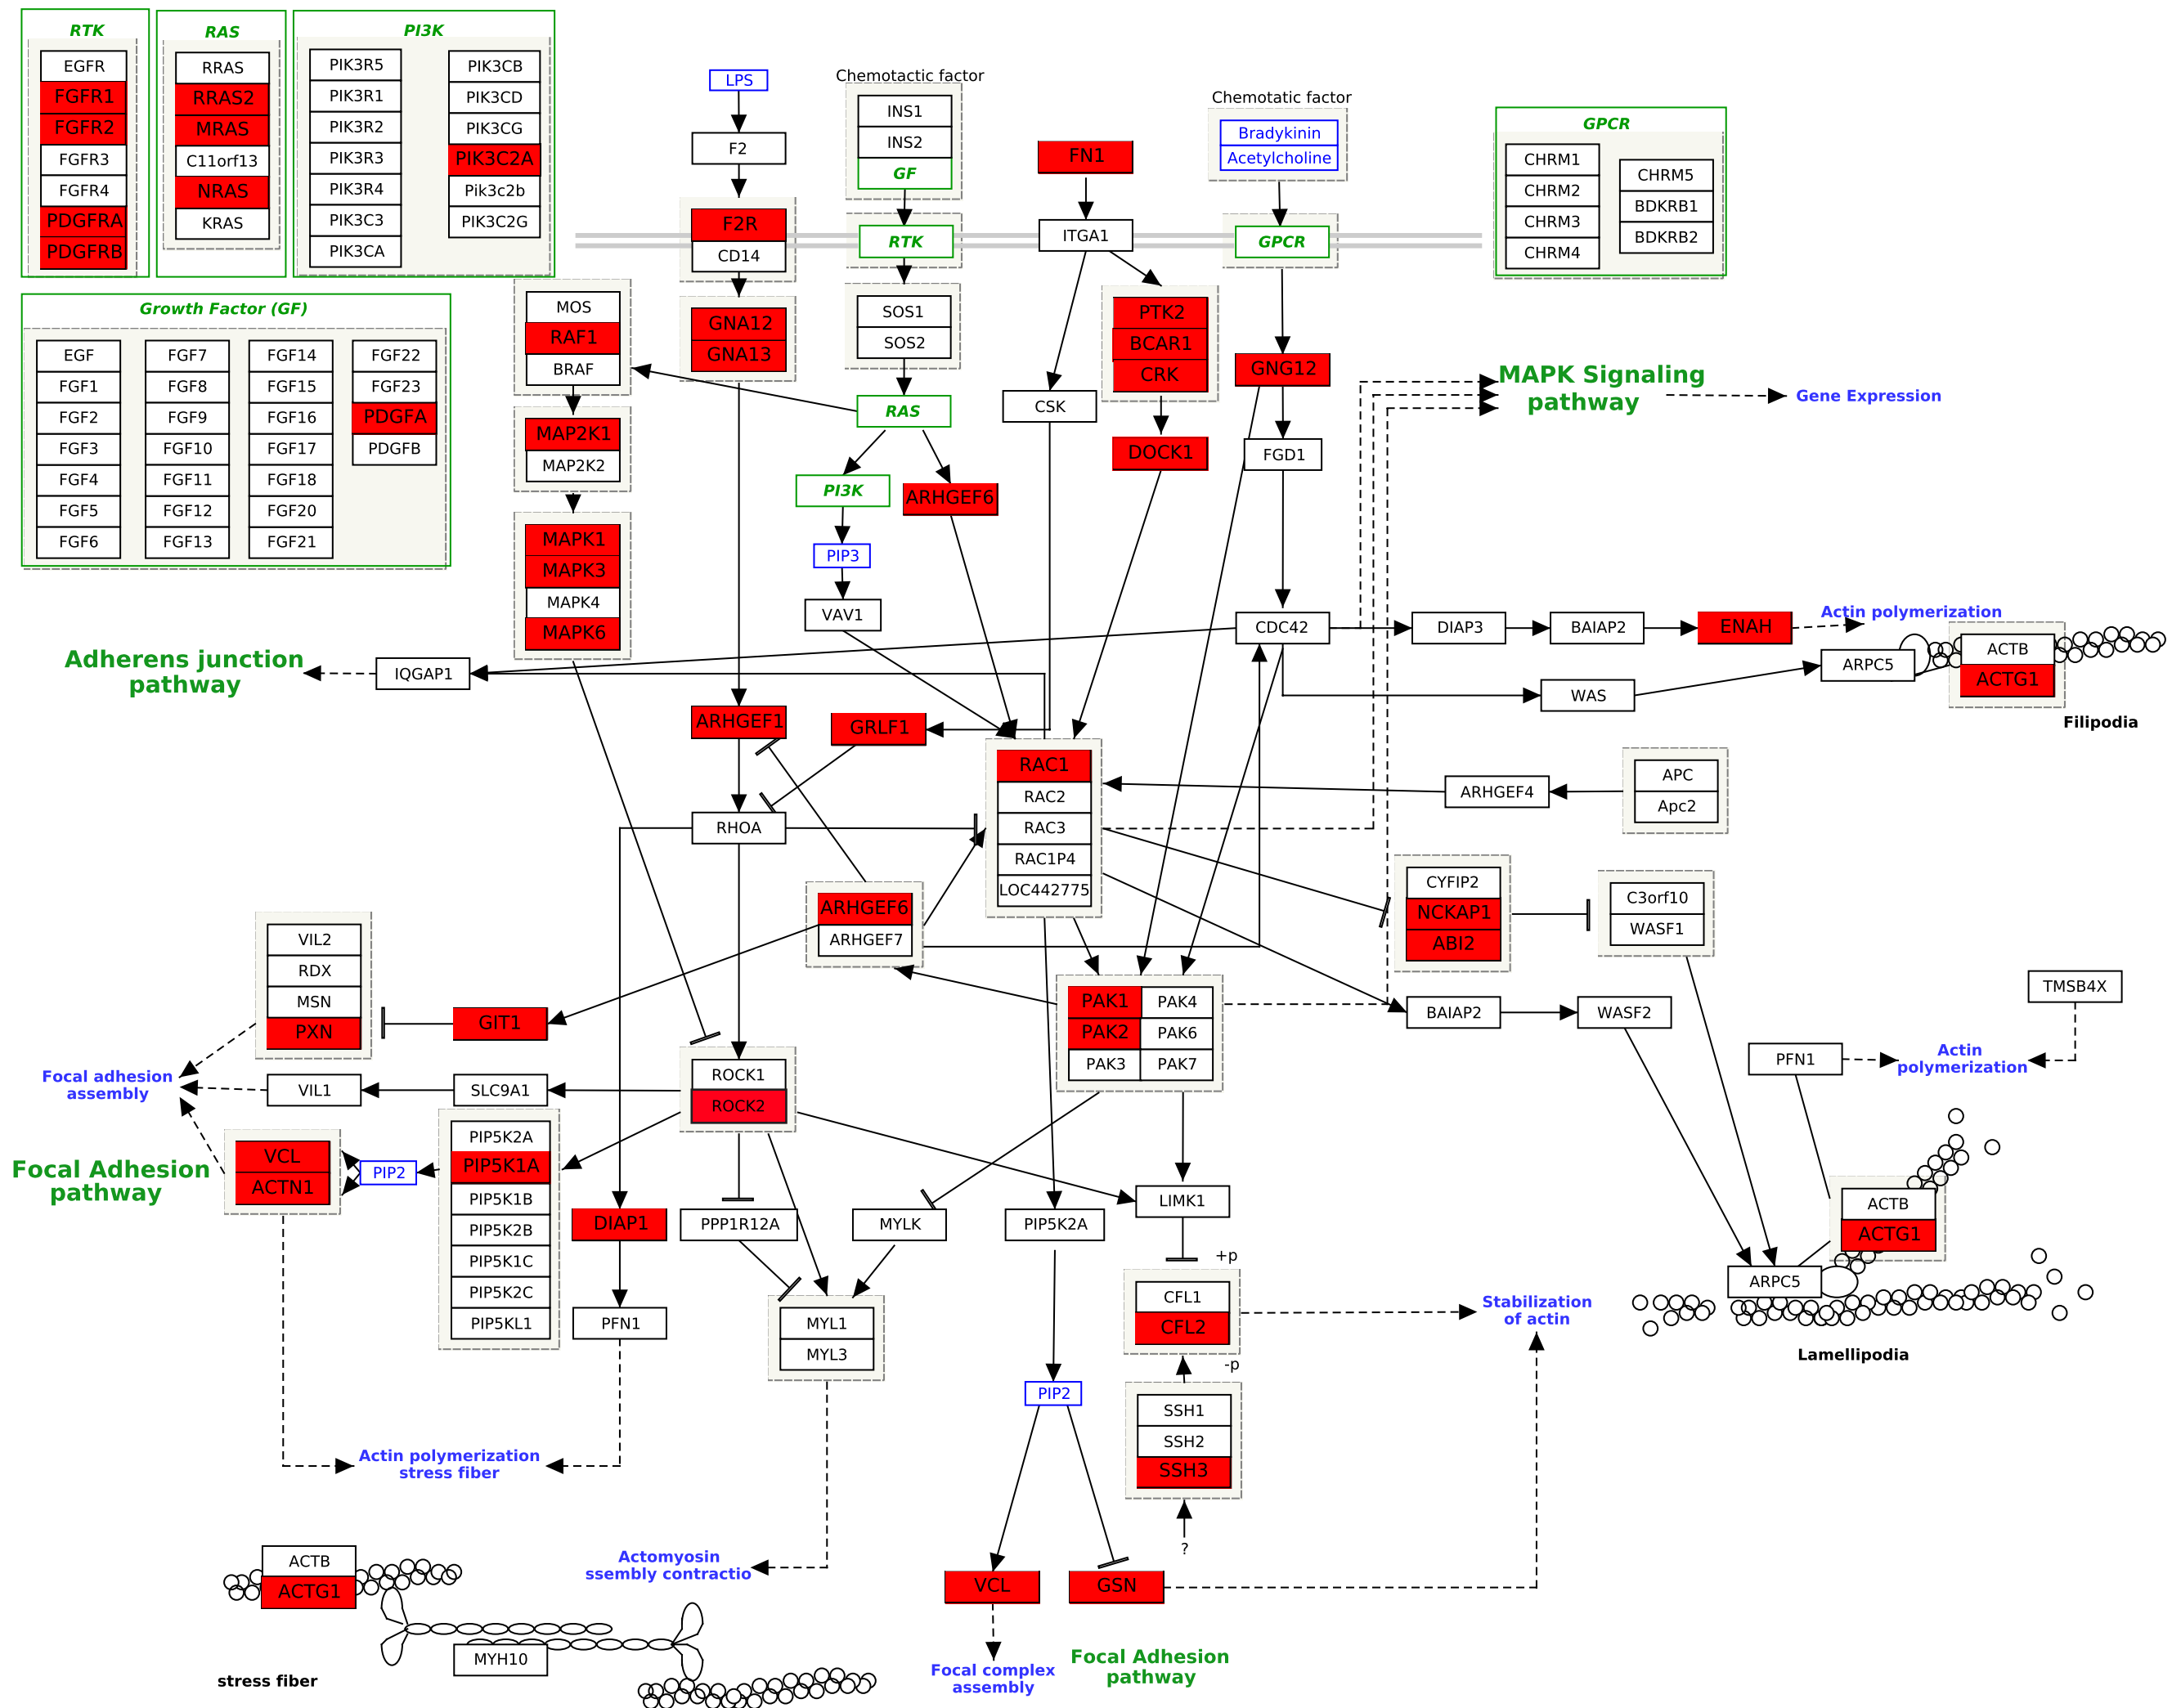

**Supplementary Figure 6** Wikipathway for the regulation of the actin cytoskeleton (WP51). Transcripts that immunoprecipitated with MBNL1 are colored in red. Refers to [Figure 4](#)



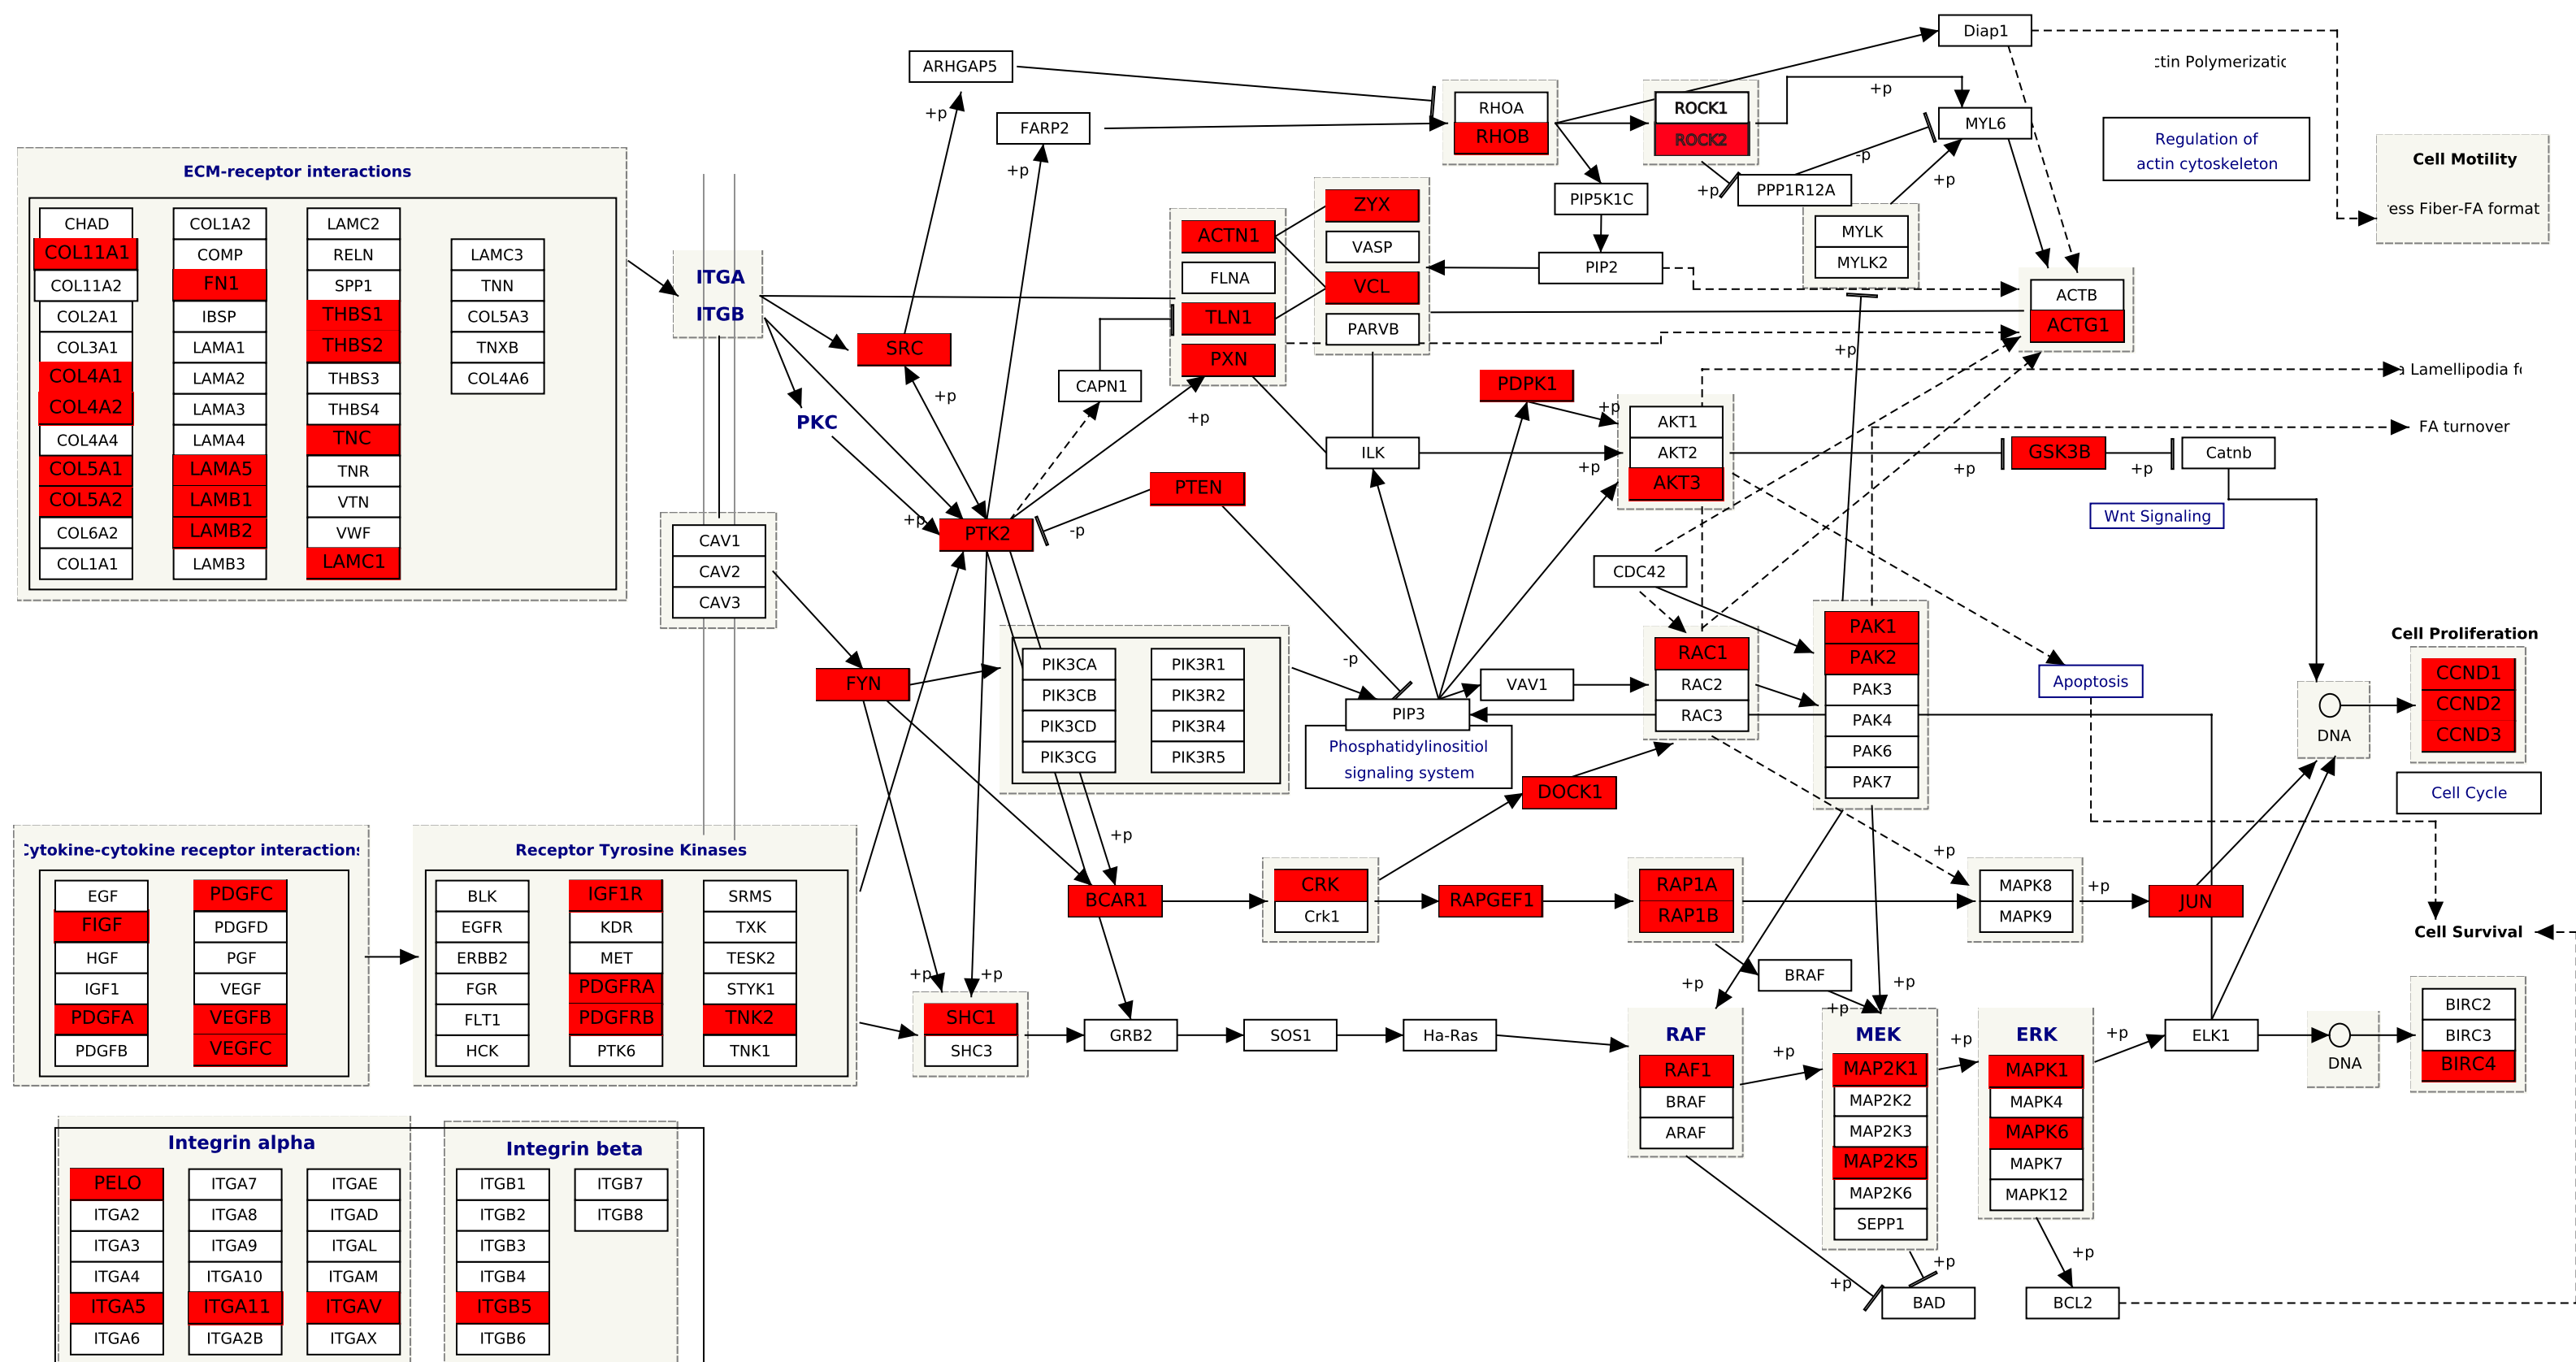

**Supplementary Figure 7** Wikipathway for focal adhesion signaling (WP360). Transcripts that immunoprecipitated with MBNL1 are colored in red. Refers to [Figure 4](#)

**Supplementary Table 1. MBNL1 RIP targets with identified or predicted conserved binding sites, Related to Figure 4.**

A list of MBNL1-bound RNAs (MBNL1 RIP-Seq) categorized by predicted 3'UTR conserved binding sites, CLIP-seq identified 3'UTR binding sites, CLIP-seq identified intronic binding sites, and CLIP-seq identified exonic binding sites. Blue text indicates targets confirmed in Figure 4

| RIP Targets with Conserved 3' UTR Binding Sites (Human Sequence) | RIP Targets with Identified 3'UTR Binding Sites (CLIP-Seq) | RIP Targets with Identified Intronic Binding Sites (CLIP-Seq) | RIP Targets with Identified Extronic Binding Sites (CLIP-Seq) |
|------------------------------------------------------------------|------------------------------------------------------------|---------------------------------------------------------------|---------------------------------------------------------------|
| ABHD2                                                            | Abi1                                                       | Ankrd13a                                                      | Acap2                                                         |
| ACVR1                                                            | Actc1                                                      | Atp2a2                                                        | Akt3                                                          |
| ADAMTS1                                                          | Actr2                                                      | Capza1                                                        | Atf6                                                          |
| ADM                                                              | Adam10                                                     | Dst                                                           | Cxadr                                                         |
| AGO2                                                             | Aes                                                        | Dynll2                                                        | Dst                                                           |
| AGTR1                                                            | Aff4                                                       | Eif5                                                          | Enah                                                          |
| ALDH3A2                                                          | Akap2                                                      | Evl                                                           | Lamp2                                                         |
| ALKBH5                                                           | Alkbh5                                                     | Ext1                                                          | Lats2                                                         |
| ANG                                                              | Ammecr1l                                                   | Fam168a                                                       | Luc7l2                                                        |
| ANTXR2                                                           | Aplp2                                                      | Galnt2                                                        | Msi2                                                          |
| AP3S2                                                            | Arhgef11                                                   | Grb14                                                         | Nfia                                                          |
| ARL6IP5                                                          | Arih1                                                      | Mef2a                                                         | Nptn                                                          |
| ATP6AP2                                                          | Atp1b1                                                     | Pigf                                                          | Pdlim5                                                        |
| AXL                                                              | Atp1b3                                                     | Plekhh2                                                       | Plcg1                                                         |
| B4GALT5                                                          | Atp2a2                                                     | Rmnd5a                                                        | Ppp1cb                                                        |
| BCKDHA                                                           | Azin1                                                      | Sestd1                                                        | Rab24                                                         |
| BGN                                                              | Bcl7b                                                      | Slc39a14                                                      | Rcn2                                                          |
| BMP6                                                             | Bmpr1a                                                     | Snx12                                                         | Sdcbp                                                         |
| BMPR2                                                            | Cacna2d1                                                   | Spata5                                                        | Snx12                                                         |
| BNIP3                                                            | Camk2d                                                     | Tial1                                                         | Tnrc18                                                        |
| BUB3                                                             | Cbfb                                                       | Trak1                                                         | Trak2                                                         |
| C1R                                                              | Cbx6                                                       | Zmiz1                                                         | Usp9x                                                         |
| C1S                                                              | Cds2                                                       |                                                               | Wapal                                                         |
| C2                                                               | Celf1                                                      |                                                               | Yap1                                                          |
| C3                                                               | Celf2                                                      |                                                               | Sod2                                                          |
| CADM1                                                            | Cggbp1                                                     |                                                               |                                                               |
| CARHSP1                                                          | Cited2                                                     |                                                               |                                                               |



|                        |                       |
|------------------------|-----------------------|
| CBFB                   | Clic4                 |
| CCL2                   | Cmpk1                 |
| CCL7                   | Col4a2                |
| CD151                  | Crip2                 |
| CD200                  | Csnk1a1               |
| CD55                   | Ctnnb1                |
| CD59                   | Dcaf8                 |
| CDH2                   | Degs1                 |
| CDKN1A                 | Dr1                   |
| CEBPB                  | Dync1li2              |
| CEBPD                  | Dynll2                |
| CELF1                  | Edem1                 |
| CHI3L1                 | Ehd4                  |
| CHPT1                  | Eif2ak1               |
| CHST11                 | Eif4e                 |
| CITED2                 | Epc2                  |
| CLU                    | Epdr1                 |
| CNPPD1                 | Fhl2                  |
| COL12A1                | Fstl1                 |
| COL16A1                | Gnb1                  |
| COL4A1                 | Golph3                |
| COL4A2                 | Grk5                  |
| COL8A1                 | Hif1a                 |
| COMMD3                 | Hipk1                 |
| CPE                    | Hipk3                 |
| CRIM1                  | Hnrnpul2              |
| CRLF1                  | <a href="#">Il6st</a> |
| CSF1                   | Inpp5a                |
| CST3                   | Ivns1abp              |
| CTSH                   | Klhdc10               |
| <a href="#">CXCL12</a> | Laptm4a               |
| CXCL16                 | Lman2                 |
| CXCL6                  | Lrrc58                |
| CYR61                  | Lsm14a                |
| DCN                    | Mapk1                 |
| DDOST                  | Mapk14                |
| DES                    | Mat2b                 |
| DPAGT1                 | Max                   |
| DPY19L1                | <a href="#">Mbnl1</a> |
| DUSP1                  | Mbnl2                 |
| EDN1                   | Msi2                  |

|                     |                        |
|---------------------|------------------------|
| EGLN1               | Mtpn                   |
| EMILIN1             | Myadm                  |
| ENG                 | Nampt                  |
| ENO2                | Ndel1                  |
| ENPP2               | Nedd4                  |
| EPHB4               | Nf1                    |
| ERAP1               | Nfat5                  |
| ERO1L               | Nploc4                 |
| ESYT2               | Nudt3                  |
| F2R                 | Ociad1                 |
| FAM129B             | Otud4                  |
| FAM171A1            | Oxct1                  |
| FBLN1               | Pafah1b2               |
| FBXL5               | Paip2b                 |
| FIGF                | Pcmt1                  |
| FLRT2               | Pdrg1                  |
| FMOD                | Pls3                   |
| <a href="#">FN1</a> | Ppp2r5c                |
| FST                 | <a href="#">Ppp3cb</a> |
| FURIN               | Ppp3r1                 |
| FZD1                | Prkacb                 |
| GAA                 | Prkar1a                |
| GABARAPL1           | Psap                   |
| GABARAPL2           | Rab1                   |
| GADD45G             | Rab10                  |
| GALK2               | Rab11b                 |
| GALNT2              | Rab18                  |
| GDA                 | Rab2a                  |
| GFPT2               | Rap1b                  |
| GJA5                | Rbfox2                 |
| GLB1L               | Rbm39                  |
| GLIPR1              | Rbpms                  |
| GLUL                | Rftn1                  |
| GNS                 | Rhoq                   |
| GPM6B               | Rmnd5a                 |
| GPR125              | Rtn4                   |
| GPR176              | Serinc3                |
| GREM1               | Setd7                  |
| GSDMD               | Ski                    |
| GSTM5               | Snx18                  |
| GYS1                | Snx3                   |

|          |          |
|----------|----------|
| H3F3B    | Socs5    |
| H3F3C    | Spcs3    |
| HIGD1A   | Sqstm1   |
| HM13     | Stk24    |
| HMOX1    | Strn3    |
| HP       | Tbl1xr1  |
| HPRT1    | Tead1    |
| HPX      | Tial1    |
| HS6ST1   | Tmem106b |
| HSPB8    | Tmtc1    |
| ICAM1    | Tmx4     |
| IGF1R    | Tomm70a  |
| IGFBP3   | Tsc22d1  |
| IGFBP7   | Tsn      |
| IL1R1    | Ttc39b   |
| IL1RL1   | Tuba4a   |
| IL4R     | Ubqln2   |
| IL6ST    | Usp14    |
| IMPAD1   | Vamp3    |
| IRF2BP2  | Vcl      |
| ISG15    | VeZF1    |
| ITGA5    | Wbp2     |
| ITM2C    | Wnk1     |
| JAM3     | Ywhag    |
| JUNB     | Zbtb44   |
| KHDRBS1  | Zfp106   |
| KLHL24   |          |
| LAGE3    |          |
| LAMA5    |          |
| LAMB1    |          |
| LAMP2    |          |
| LAPTM4A  |          |
| LDHA     |          |
| LGALS3BP |          |
| LGALS9   |          |
| LMO4     |          |
| LOX      |          |
| LRP1     |          |
| LRP10    |          |
| LTBP1    |          |
| LTBP2    |          |

LTBP3  
LY6E  
LYPLA2  
MAN2B1  
MAOA  
MBNL1  
MGAT1  
MGP  
MIF  
MMP2  
MRC2  
MT2A  
MX2  
NDFIP2  
NDUFA2  
NFIB  
NFKBIA  
NOV  
NT5E  
OLR1  
ORMDL3  
OSMR  
OST4  
P4HA2  
PALLD  
PAM16  
PARM1  
PBX1  
PDGFRA  
PDRG1  
PELI1  
PFKL  
PGRMC1  
PGRMC2  
PLA1A  
PLBD2  
PLEKHA3  
PLOD2  
PML  
PNRC1  
PPAP2A

PRELP  
PRNP  
PROS1  
PRRX1  
PSEN2  
PSMF1  
PTBP3  
PTGIS  
PTK7  
PTX3  
RAB32  
RANBP9  
RASL11B  
RBP1  
RBPMS  
RDM1  
RETSAT  
RGS16  
RGS2  
RNASE4  
RPP14  
SDC4  
SELT  
SEMA3C  
SERINC1  
SERPINB9  
SERPINE1  
SERPING1  
SHISA5  
SLC2A1  
SLC2A3  
SLC35B1  
SLC39A14  
SLC7A2  
SLIT3  
SMAD7  
SMIM14  
SMIM7  
SMOC1  
SMPD1  
SOD2

SOD3  
SSR3  
STAT2  
SULF1  
SUN2  
TAGLN2  
TEAD1  
TF  
TFPI2  
TGM2  
THBS2  
TIMP1  
TMEM167B  
TMEM176A  
TMEM179B  
TMEM87A  
TNC  
TNPO2  
TOMM6  
TPI1  
TPP1  
TSPAN31  
TSPAN6  
TSPO  
UAP1  
UBALD2  
UBC  
UBR4  
UGCG  
UGDH  
VCAN  
VEGFC  
VGLL3  
VMP1  
WDFY3  
WFDC1  
WIPI2  
YPEL3  
ZFAND5  
ZFP36L1  
ZNRF2

**Supplementary Table 2.** Fold enrichment of MBNL1 bound messages, refers to [Figure 4](#)

| <b>Transcript</b> | <b>Input (%)</b> | <b>Fold Enrichment<br/>(<math>2^{-\Delta\Delta Ct}</math>)</b> |
|-------------------|------------------|----------------------------------------------------------------|
| <b>TGFβR1</b>     | <b>0.24</b>      | <b>0.00</b>                                                    |
| <i>stdev</i>      | 0.07             | 0.00                                                           |
| <b>TGFβR2</b>     | <b>0.19</b>      | <b>0.66</b>                                                    |
| <i>stdev</i>      | 0.02             | 0.05                                                           |
| <b>CnAβ1</b>      | <b>4.10</b>      | <b>0.45</b>                                                    |
| <i>stdev</i>      | 1.89             | 0.05                                                           |
| <b>SRF</b>        | <b>1.41</b>      | <b>0.76</b>                                                    |
| <i>stdev</i>      | 0.42             | 0.21                                                           |
| <b>ROCK2</b>      | <b>0.49</b>      | <b>2.26</b>                                                    |
| <i>stdev</i>      | 0.15             | 1.13                                                           |
| <b>α1CATENIN</b>  | <b>3.16</b>      | <b>25.59</b>                                                   |
| <i>stdev</i>      | 2.01             | 12.60                                                          |
| <b>ARHGEF11</b>   | <b>1.32</b>      | <b>47.77</b>                                                   |
| <i>stdev</i>      | 0.20             | 23.70                                                          |
| <b>TWIST1</b>     | <b>1.83</b>      | <b>0.66</b>                                                    |
| <i>stdev</i>      | 1.74             | 0.22                                                           |
| <b>FOXO3</b>      | <b>0.21</b>      | <b>2.54</b>                                                    |
| <i>stdev</i>      | 0.05             | 1.28                                                           |
| <b>RUNX1</b>      | <b>0.28</b>      | <b>5.59</b>                                                    |
| <i>stdev</i>      | 0.08             | 2.60                                                           |
| <b>CXCL2</b>      | <b>0.24</b>      | <b>1.27</b>                                                    |
| <i>stdev</i>      | 0.08             | 0.68                                                           |
| <b>IL6ST</b>      | <b>0.29</b>      | <b>4.71</b>                                                    |
| <i>stdev</i>      | 0.04             | 2.36                                                           |
| <b>FnEDa</b>      | <b>0.24</b>      | <b>0.20</b>                                                    |
| <i>stdev</i>      | 0.10             | 0.10                                                           |
